# Supplementary material
Source: PubMed Central journal article supplement (PMC4245992)
Supplement: la502955h_si_001.pdf [file la502955h_si_001.pdf]

## Nanometric Resolution in the Hydrodynamic Size Analysis of Ligand-Stabilized Gold Nanorods: Supporting Information

Jonathan G. Mehtala and Alexander Wei\*

Department of Chemistry and Birck Nanotechnology Center, Purdue University,  
West Lafayette, IN USA

### I. TEM size analysis of citrate-stabilized gold nanorods (Cit-GNRs)

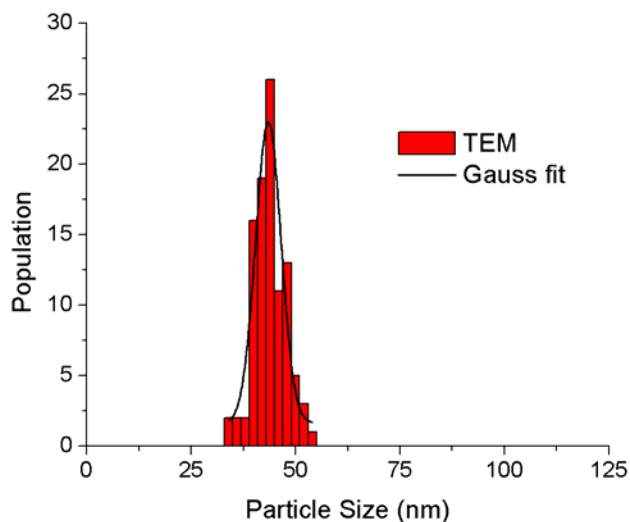

**Figure S1.** Histogram of cit-GNR length using TEM size analysis (taken from 3 images at a resolution of 1.4 pixels/nm). Particle count  $N = 100$ ; mean = 44.4 nm; std. dev. = 3.9 nm

## II. Ligand exchange with GNRs in the presence of PSS

Ligand exchange in the presence of PSS does not proceed as well as with fully purified cit-GNRs. Significant aggregation can be observed by NTA if the Na-PSS loading is above 1.5 mg/mL (0.15 wt%), prior to centrifugation and redispersion (C/R) in fresh surfactant solution (Figure S2a). Differences in the vis-NIR absorbance spectra are more subtle, but also indicate a modest degree of aggregation (Figure S2b). Surface functionalizations directly with PSS-GNRs (i.e. without citrate treatment) are variable in efficacy, and less reliable than with cit-GNRs (Figure S2c,d). We thus recommend using PSS as a detergent rather than as a stabilizing surfactant,<sup>18</sup> and to limit the PSS concentration to 0.15 wt% or less (*cf.* Ref. 20, Stage 5), prior to centrifugation and redispersion control in 5 mM citrate.

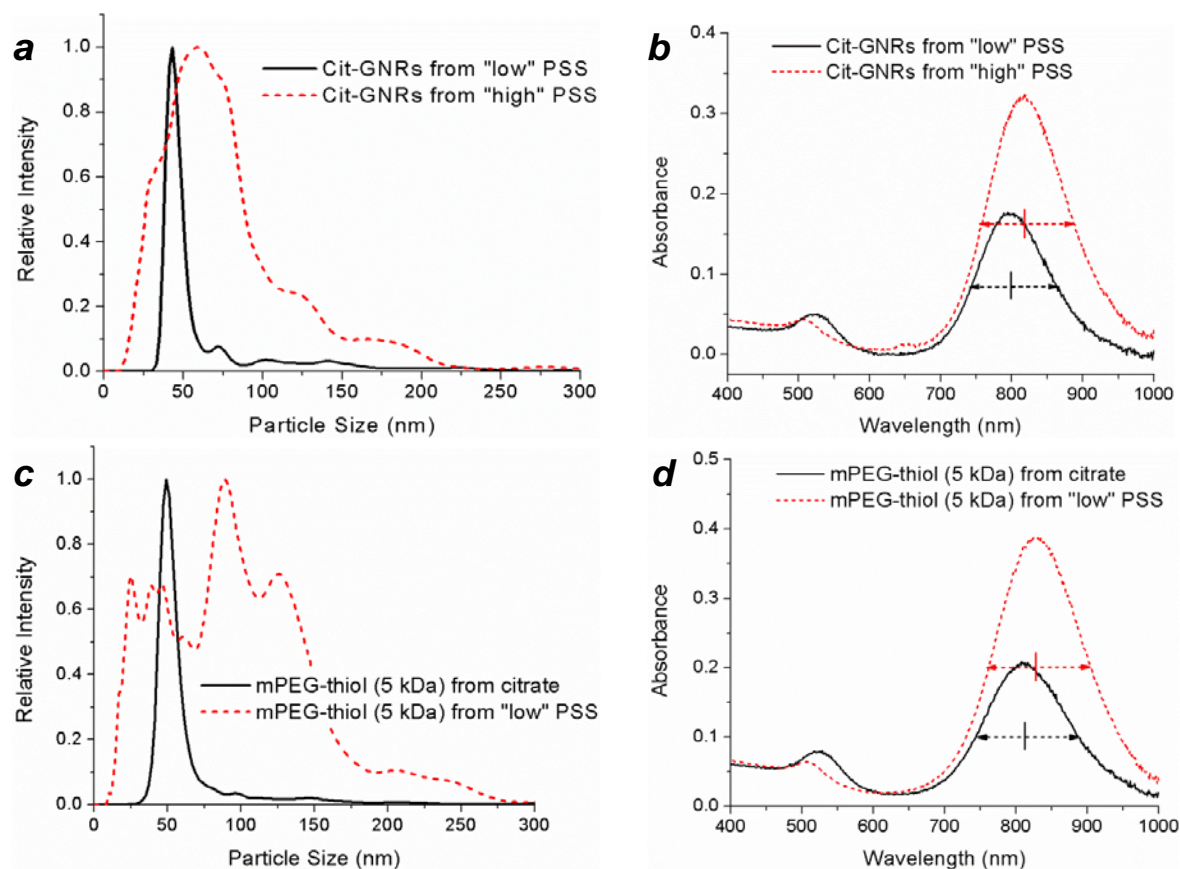

**Figure S2.** NTA plots and vis-NIR spectra of citrate-stabilized GNRs previously suspended in Na-PSS solutions at different concentrations. (a,b) GNRs redispersed in 5 mM Na<sub>3</sub>-cit after 1 C/R cycle from 0.35 wt% Na-PSS ("high") or from < 0.15 wt% Na-PSS ("low"). (c,d) GNRs redispersed in 1.2 mM 5-kDa mPEG-SH after 1 C/R cycle from 5 mM Na<sub>3</sub>-cit or after 1 C/R cycle from "low" PSS.

### III. Ligand exchange with Cit-GNRs

All experiments were performed with cit-GNRs obtained after two C/R cycles with 5 mM  $\text{Na}_3\text{-cit}$ .<sup>20</sup> In most cases, cit-GNRs were centrifuged and separated from the supernatant, then redispersed into aqueous solutions containing surfactant and allowed to sit for 12–20 hours. Excess surfactant was removed by centrifugation and redispersion in pure water, prior to analysis.

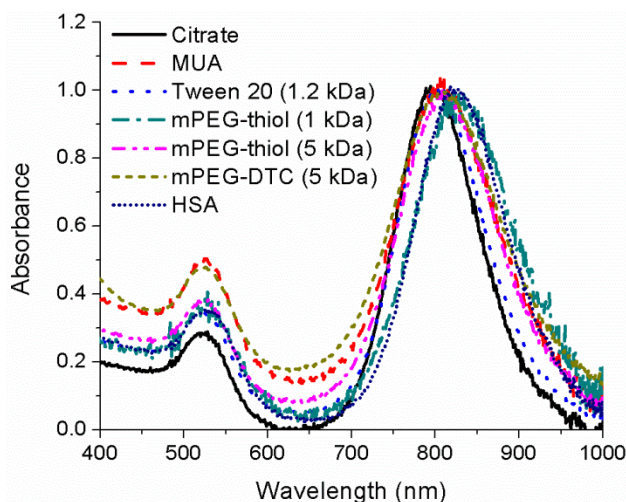

**Figure S3.** Normalized absorbance spectra of surfactant-stabilized GNRs, produced by surface exchange with cit-GNRs using a variety of ligands, surfactants, or proteins. Minor shifts in  $\lambda_{\text{LPR}}$  can be observed, consistent with changes in the surface dielectric.

### IV. Ligand exchange as a function of PEG-thiol concentration

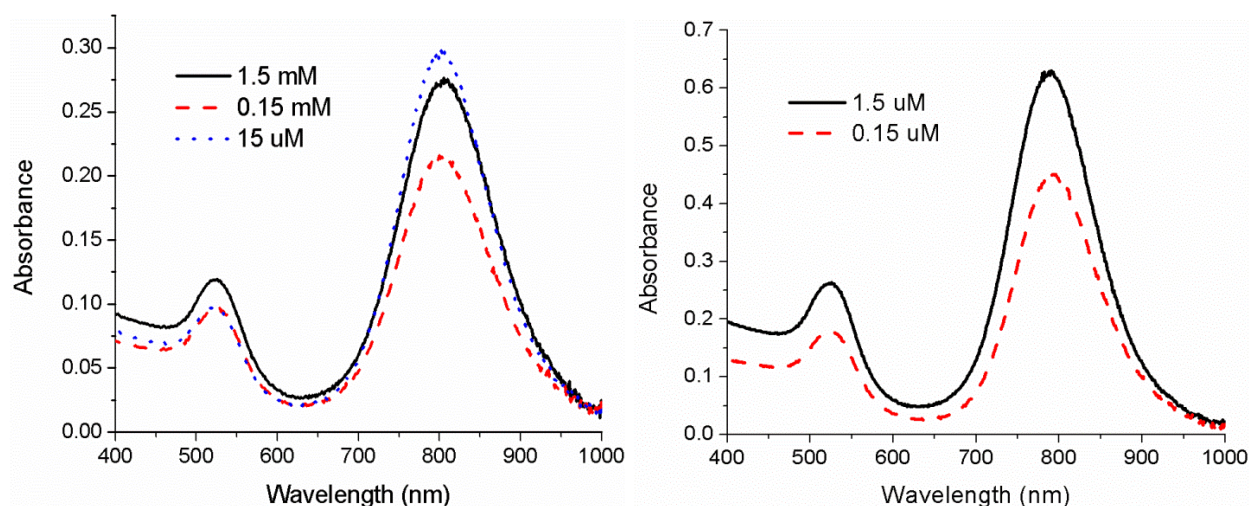

**Figure S4.** Vis-NIR absorbance spectra of cit-GNRs incubated for 12 hours with mPEG-thiol (5 kDa) at loadings ranging from 1.5 mM to 0.15  $\mu\text{M}$ . Only minor differences in spectral profile can be discerned, in the visible region ( $\lambda < 700$  nm).
